# Supplementary material for: The mechanism of thiophene oxidation on metal-free two-dimensional hexagonal boron nitride
Source: Royal Society of Chemistry journal article supplement (doi:10.1039/c9cp03758f), 2019-01-01
Supplement: c9cp03758f1.pdf [file c9cp03758f1.pdf]

The mechanism of Thiophene oxidation on Metal-free Two-dimensional Hexagonal Boron Nitride

Naixia Lv <sup>a</sup>, Linghao Sun <sup>b</sup>, Linlin Chen <sup>b</sup>, Yujun Li <sup>b</sup>, Jinrui Zhang <sup>b</sup>, Peiwen Wu <sup>b</sup>, Hongping Li <sup>c\*</sup>, Wenshuai, Zhu <sup>b\*</sup>, Huaming, Li <sup>c</sup>

<sup>[a]</sup>College of Biology and Chemistry, Xingyi Normal University For Nationalities, Xingyi, 562400,

P. R. China

<sup>[b]</sup>School of Chemistry and Chemical Engineering, Jiangsu University, Zhenjiang 212013, P. R.

China

<sup>[c]</sup>Institute for Energy Research, Jiangsu University, Zhenjiang, 212013, P. R.China.

**\*Corresponding author:**

E-mail: [hongpingli@ujs.edu.cn](mailto:hongpingli@ujs.edu.cn) (H. P. Li); [zhuws@ujs.edu.cn](mailto:zhuws@ujs.edu.cn) (W. S. Zhu)

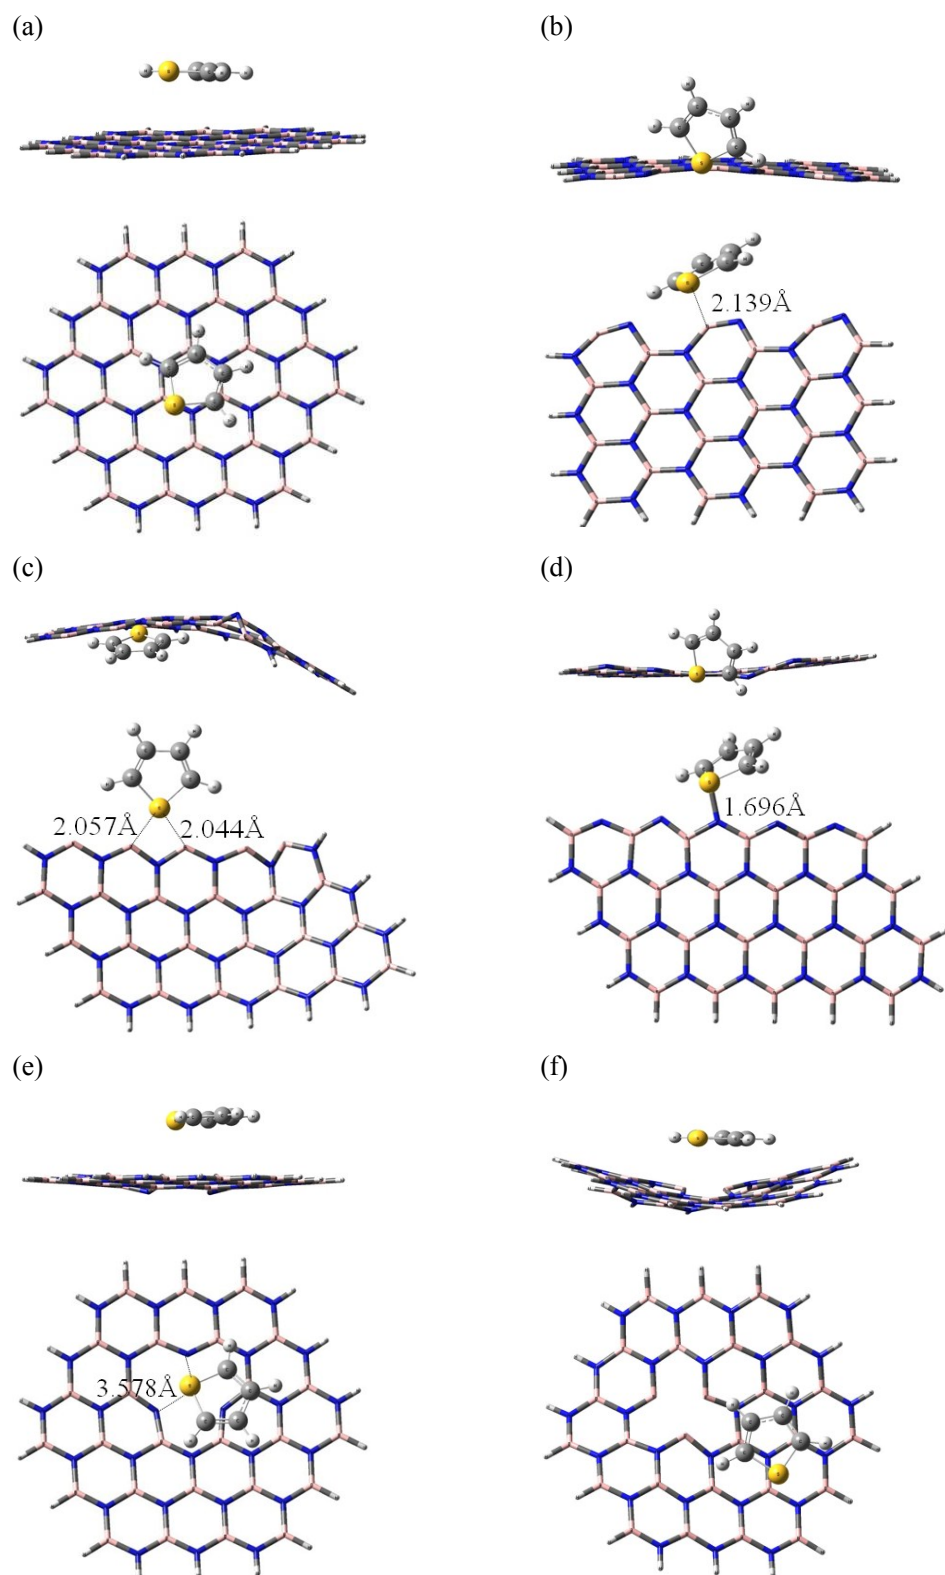

FIGURE S1 Thiophene (C<sub>4</sub>H<sub>4</sub>S) adsorption on perfect h-BN, armchair, zig-B, zig-N, B-vacancy, N-vacancy models. (a) perfect h-BN-C<sub>4</sub>H<sub>4</sub>S; (b) arm-C<sub>4</sub>H<sub>4</sub>S; (c) zig-B-C<sub>4</sub>H<sub>4</sub>S; (d) zig-N-C<sub>4</sub>H<sub>4</sub>S; (e) B-vacancy-C<sub>4</sub>H<sub>4</sub>S; (f) N-vacancy-C<sub>4</sub>H<sub>4</sub>S;

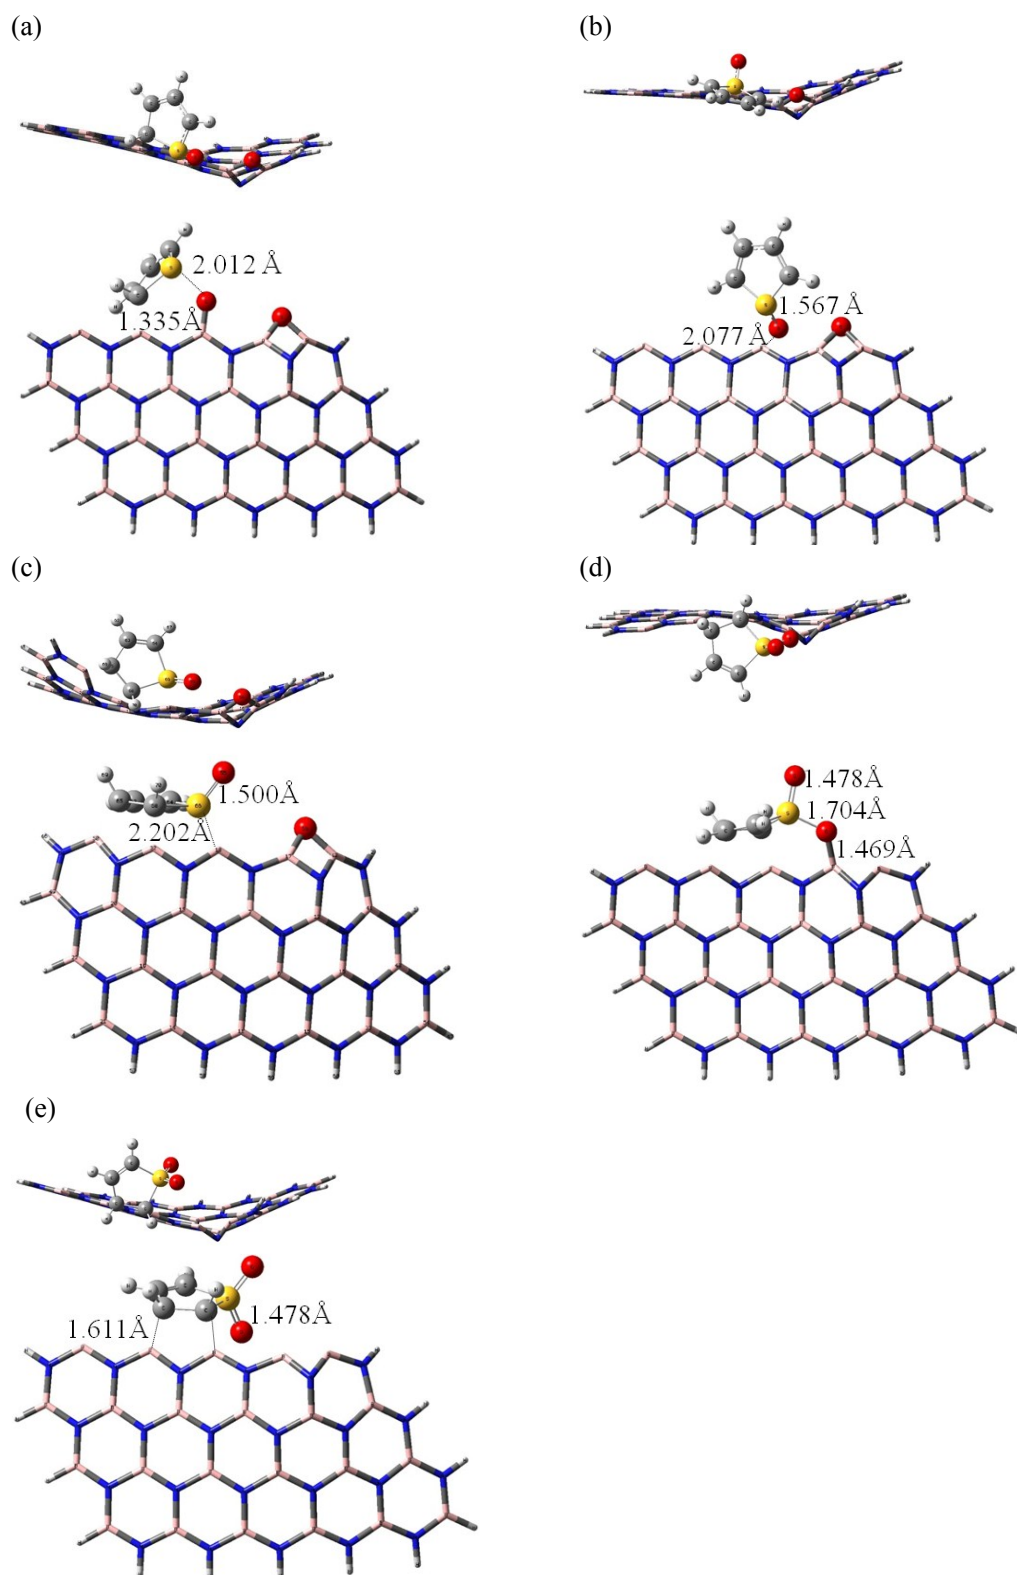

FIGURE S2 The oxidation of thiophene on zig-B models. (a) OO/C<sub>4</sub>H<sub>4</sub>S co-adsorption; (b) TS1-zig-B; (c) IM1-zig-B; (d) TS2-zig-B; (e) FS-zig-B

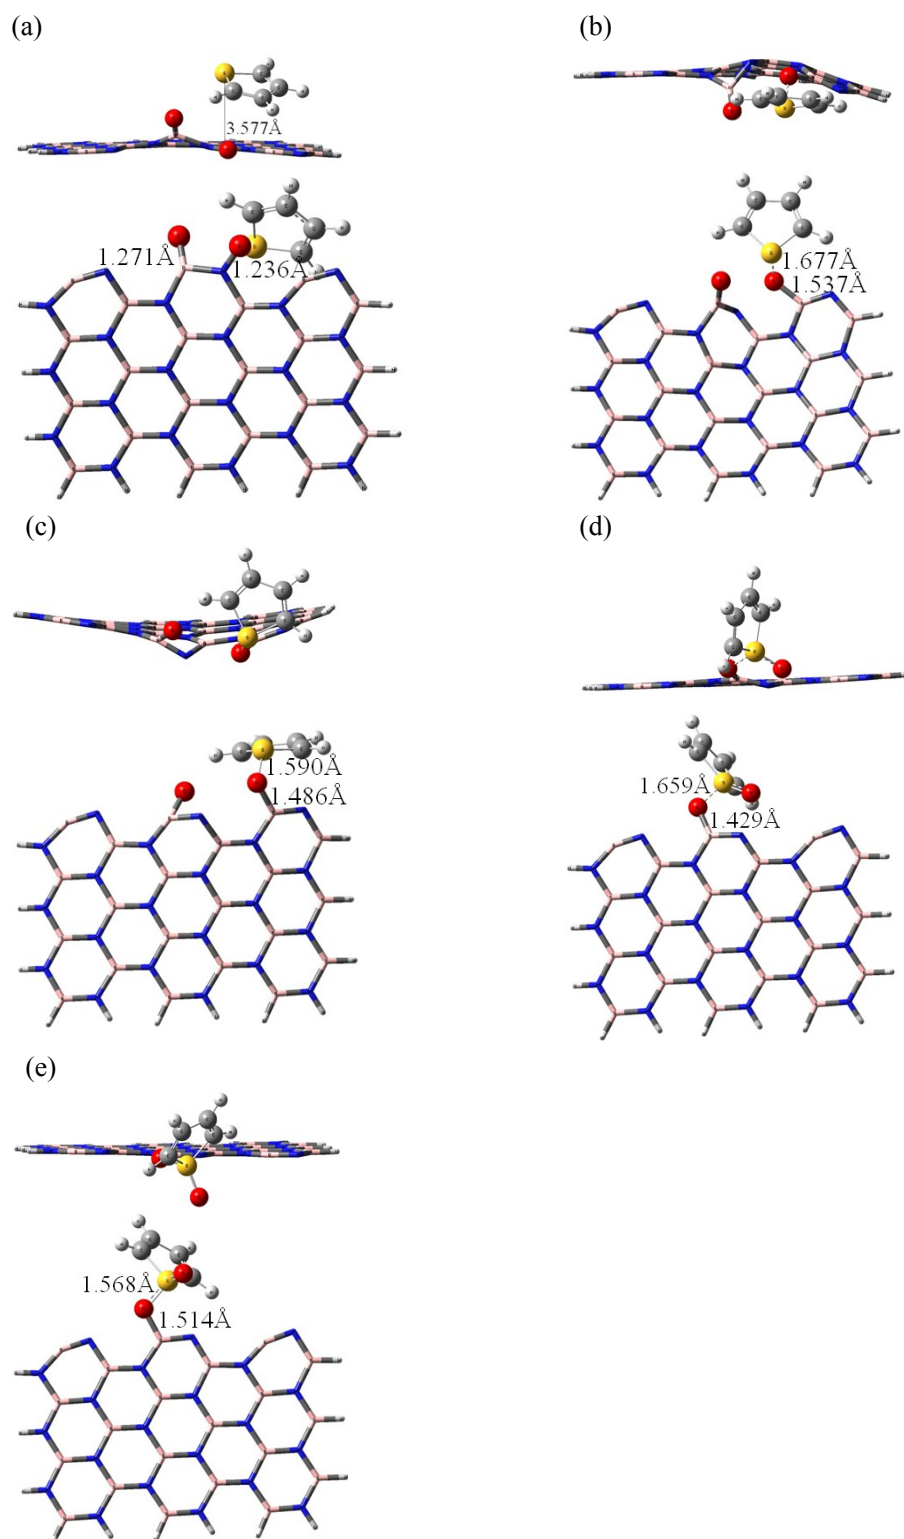

FIGURE S3 The oxidation of thiophene on armchair models.(a) OO/C<sub>4</sub>H<sub>4</sub>S co-adsorption; (b)TS1-arm; (c)IM1-arm; (d) TS2-arm; (e) FS-arm

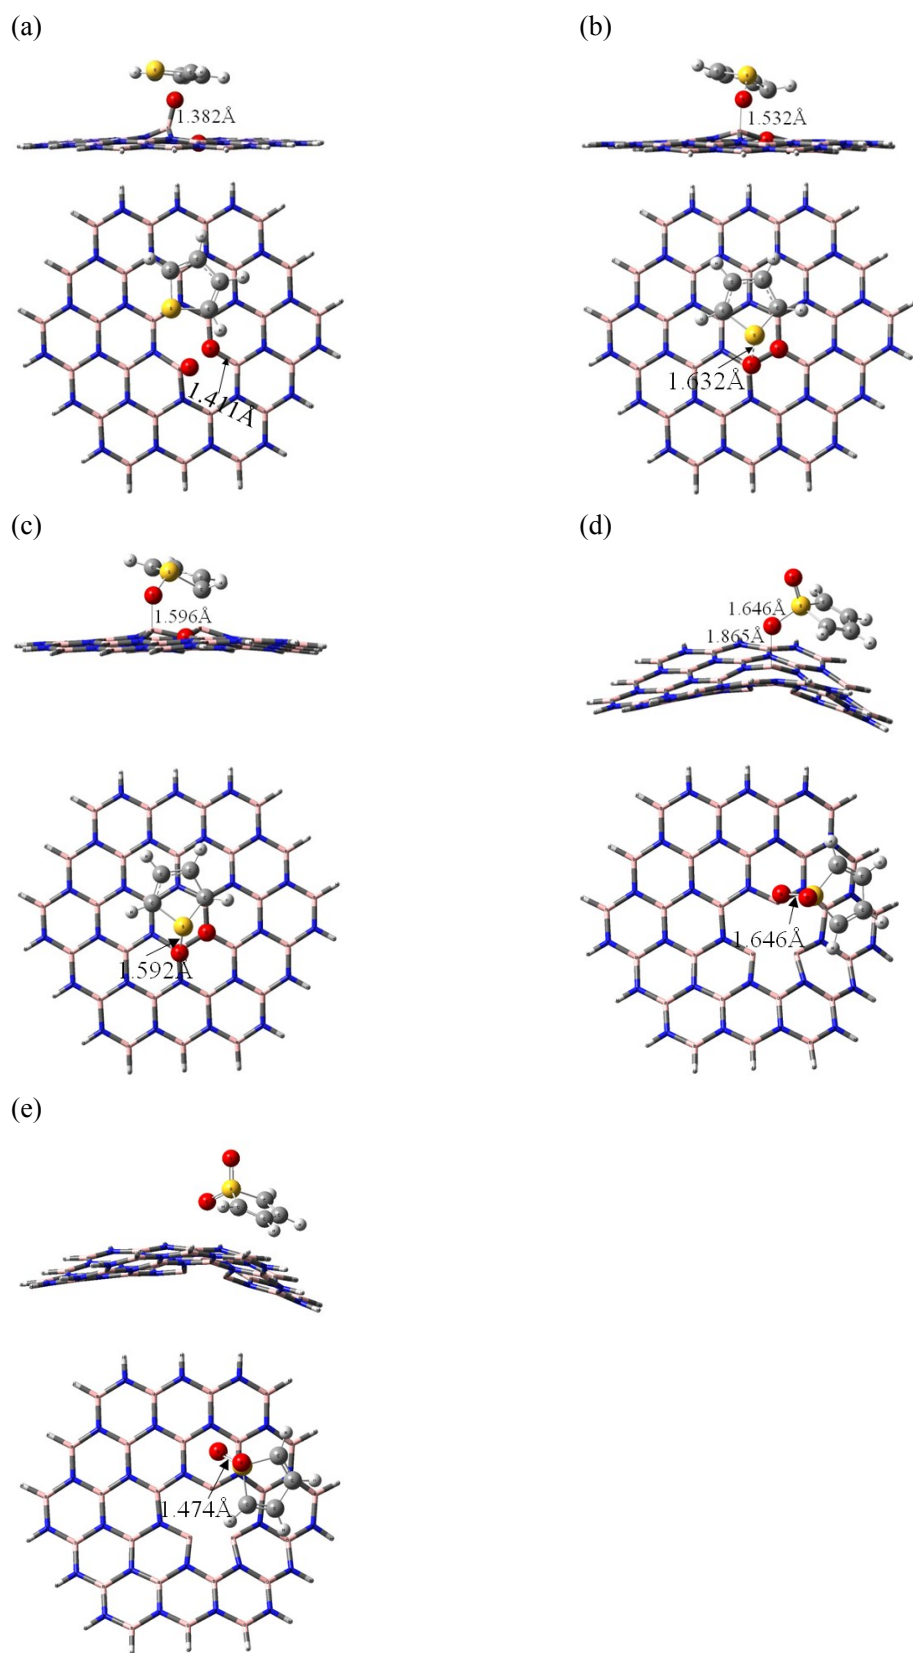

FIGURE S4 The oxidation of thiophene on N-vacancy models.(a) OO/C<sub>4</sub>H<sub>4</sub>S co-adsorption; (b)TS1-N-vacancy; (c)IM1-N-vacancy; (d) TS2-N-vacancy; (e) FS-N-vacancy

Table S1. The Electronic Energies ( $E_{\text{elec}}$ ), Enthalpies ( $H_{298}$ ), Gibbs Free Energies ( $G_{298}$ ) (All in a.u.) of all species in the process of Thiophene (TH) oxidation on the edge sites.

| species                  | $E_{\text{elec}}$ | $H_{298}$    | $G_{298}$  | $\Delta H_{298}$ | $\Delta G_{298}$ |
|--------------------------|-------------------|--------------|------------|------------------|------------------|
| O <sub>2</sub>           | -150.3646757      | -150.3575887 | -150.38087 |                  |                  |
| Thiophene(TH)            | -553.0696341      | -552.9977261 | -553.02999 |                  |                  |
| zig-B                    | -1841.38816       | -1840.966526 | -1841.0593 |                  |                  |
| 2O-zig-B                 | -1992.211342      | -1991.776248 | -1991.8678 | -283.719         | -268.363         |
| O <sub>2</sub> -zig-B    | -1992.043858      | -1991.609428 | -1991.7024 | -179.037         | -164.568         |
| TH-zig-B                 | -2394.499474      | -2394.003282 | -2394.1058 | -24.492          | -10.3815         |
| 2O-TH- zig-B             | -2545.2809        | -2544.772365 | -2544.8777 | -282.708         | -255.754         |
| TS1-zig-B                | -2545.063461      | -2544.558438 | -2544.6647 | -148.467         | -122.096         |
| IM1-zig-B                | -2545.223394      | -2544.714633 | -2544.8163 | -246.481         | -217.22          |
| TS2-zig_B                | -2545.072766      | -2544.566621 | -2544.6674 | -153.602         | -123.764         |
| FS-zig-B                 | -2545.088175      | -2544.578966 | -2544.683  | -161.349         | -133.543         |
| zig-N                    | -1841.297632      | -1840.888720 | -1840.9833 |                  |                  |
| 2O-zig_N                 | -1991.748461      | -1991.326596 | -1991.4256 | -50.3809         | -38.5479         |
| O <sub>2</sub> -zig-N    | -1991.693744      | -1991.274590 | -1991.3743 | -17.7465         | -6.376           |
| TH-zig_N                 | -2394.418015      | -2393.933549 | -2394.0395 | -29.5575         | -16.445          |
| 2O-TH-zig-N              | -2544.916424      | -2544.418826 | -2544.5259 | -109.683         | -82.6373         |
| TS1-zig-N                | -2544.769035      | -2544.277822 | -2544.3915 | -21.2013         | 1.692143         |
| IM1-zig-N                | -2544.909155      | -2544.412331 | -2544.5196 | -105.608         | -78.6824         |
| TS2-zig-N                | -2544.903189      | -2544.407159 | -2544.5123 | -102.362         | -74.1244         |
| FS-zig-N                 | -2544.972614      | -2544.473852 | -2544.5805 | -144.213         | -116.951         |
| armchair                 | -1681.422603      | -1681.040501 | -1681.1289 |                  |                  |
| 2O-armchair              | -1831.857263      | -1831.465501 | -1831.5596 | -42.3011         | -31.2255         |
| O <sub>2</sub> -armchair | -1831.798076      | -1831.407337 | -1831.5031 | -5.80277         | 4.210404         |
| TH-armchair              | -2234.512312      | -2234.056281 | -2234.1583 | -11.3289         | 0.363454         |
| 2O-TH-armchair           | -2384.953394      | -2384.487844 | -2384.5964 | -57.7484         | -35.5396         |
| TS1-armchair             | -2384.90218       | -2384.439207 | -2384.5405 | -27.2282         | -0.43976         |
| IM1-armchair             | -2384.927831      | -2384.462768 | -2384.5677 | -42.0127         | -17.5279         |
| TS2-armchair             | -2384.857649      | -2384.394192 | -2384.4994 | 1.019076         | 25.37337         |
| FS-armchair              | -2384.924079      | -2384.457812 | -2384.5647 | -38.9028         | -15.6046         |

Table S2. The Electronic Energies ( $E_{\text{elec}}$ ), Enthalpies ( $H_{298}$ ), Gibbs Free Energies ( $G_{298}$ ) (All in a.u.) of all species in the process of thiophene (TH) oxidation on the B- and N- vacancy sites.

| species                   | $E_{\text{elec}}$ | $H_{298}$    | $G_{298}$  | $\Delta H_{298}$ | $\Delta G_{298}$ |
|---------------------------|-------------------|--------------|------------|------------------|------------------|
| B-vacancy                 | -2138.562525      | -2138.048758 | -2138.1492 |                  |                  |
| 2O-B-vacancy              | -2288.994012      | -2288.467753 | -2288.5717 | -38.5333         | -26.15           |
| O <sub>2</sub> -B-vacancy | -2288.902583      | -2288.377384 | -2288.4848 | 18.17407         | 28.40813         |
| TH-B-vacancy              | -2691.652461      | -2691.062978 | -2691.1852 | -10.3505         | -3.81808         |
| 2O-TH-B-vacancy           | -2842.059213      | -2841.459685 | -2841.5796 | -34.8978         | -12.2654         |
| TS1-B-vacancy             | -2842.0331976     | -2841.435822 | -2841.552  | -19.923          | 5.060052         |
| IM1-B-vacancy             | -2842.0874        | -2841.486227 | -2841.6083 | -51.5531         | -30.3131         |
| TS2-B-vacancy             | -2841.985871      | -2841.389559 | -2841.5095 | 9.107115         | 31.72258         |
| FS-B-vacancy              | -2842.012181      | -2841.412647 | -2841.5373 | -5.38096         | 14.25195         |
| N-vacancy                 | -2108.737487      | -2108.222227 | -2108.3231 |                  |                  |
| 2O-N-vacancy              | -2259.46381       | -2258.934694 | -2259.0396 | -222.689         | -210.61          |
| TH-N-vacancy              | -2661.848426      | -2661.257047 | -2661.3744 | -23.2769         | -13.3942         |
| 2O-TH-N-vacancy           | -2812.558888      | -2811.955833 | -2812.0758 | -237.382         | -214.499         |
| TS1-N-vacancy             | -2812.510197      | -2811.909289 | -2812.0211 | -208.175         | -180.212         |
| IM1-N-vacancy             | -2812.513203      | -2811.911202 | -2812.0233 | -209.375         | -181.575         |
| TS2-N-vacancy             | -2812.233749      | -2811.634766 | -2811.7524 | -35.9085         | -11.5517         |
| FS-N-vacancy              | -2812.238104      | -2811.636984 | -2811.7576 | -37.3006         | -14.8559         |

The optimized geometries of the crucial structure reported in the paper  
TS1-zig-N

---

| Center<br>Number | Atomic<br>Number | Atomic<br>Type | Coordinates (Angstroms) |           |           |
|------------------|------------------|----------------|-------------------------|-----------|-----------|
|                  |                  |                | X                       | Y         | Z         |
| 1                | 1                | 0              | 5.050304                | -5.352263 | -0.131331 |
| 2                | 1                | 0              | 2.889125                | -6.686025 | -0.090350 |
| 3                | 1                | 0              | -6.565043               | 3.612996  | -0.141908 |
| 4                | 1                | 0              | -4.424970               | 5.003816  | -0.282100 |
| 5                | 5                | 0              | -1.436533               | 0.295433  | 0.023559  |
| 6                | 5                | 0              | 0.782286                | -0.872839 | 0.071775  |
| 7                | 5                | 0              | -1.339763               | -2.208412 | 0.042899  |
| 8                | 7                | 0              | -2.114903               | -0.982230 | 0.036399  |
| 9                | 7                | 0              | 0.008025                | 0.362160  | 0.044571  |
| 10               | 7                | 0              | 0.101856                | -2.154490 | 0.047267  |
| 11               | 5                | 0              | 0.725176                | 1.636310  | 0.031849  |
| 12               | 5                | 0              | 0.872773                | -3.383913 | 0.024474  |
| 13               | 5                | 0              | -3.560846               | -1.042475 | 0.033744  |
| 14               | 5                | 0              | -1.563328               | 2.797761  | -0.041762 |
| 15               | 5                | 0              | 2.910739                | 0.461753  | 0.207906  |
| 16               | 5                | 0              | 2.999445                | -2.060124 | 0.049661  |
| 17               | 5                | 0              | -1.251894               | -4.716256 | 0.028168  |
| 18               | 5                | 0              | -3.459420               | -3.549714 | 0.055260  |
| 19               | 5                | 0              | -3.683588               | 1.460122  | -0.020061 |
| 20               | 5                | 0              | -5.792344               | 0.105684  | -0.000198 |
| 21               | 5                | 0              | -3.820639               | 3.985094  | -0.144424 |
| 22               | 5                | 0              | -5.921291               | 2.609642  | -0.091989 |
| 23               | 7                | 0              | -2.435117               | 3.904963  | -0.015217 |
| 24               | 7                | 0              | -4.481159               | 2.681547  | -0.080943 |
| 25               | 7                | 0              | -6.578222               | 1.328792  | -0.044386 |
| 26               | 7                | 0              | -0.106276               | 2.861016  | -0.081383 |
| 27               | 7                | 0              | -2.231706               | 1.514071  | -0.005463 |
| 28               | 7                | 0              | -4.346058               | 0.175611  | 0.009276  |
| 29               | 7                | 0              | -6.455921               | -1.186654 | 0.031540  |
| 30               | 7                | 0              | 2.122753                | 1.629572  | 0.104049  |
| 31               | 7                | 0              | -4.233464               | -2.330891 | 0.051779  |
| 32               | 5                | 0              | -5.673840               | -2.397329 | 0.056166  |
| 33               | 5                | 0              | 5.135542                | -0.711848 | 0.060771  |
| 34               | 7                | 0              | 4.313511                | 0.374230  | 0.448534  |
| 35               | 7                | 0              | 2.224687                | -0.836565 | 0.110228  |
| 36               | 7                | 0              | -2.020983               | -3.493081 | 0.043839  |
| 37               | 7                | 0              | 4.450306                | -2.017542 | 0.013483  |

---



|    |    |   |           |           |           |
|----|----|---|-----------|-----------|-----------|
| 38 | 7  | 0 | 2.317003  | -3.336779 | 0.008240  |
| 39 | 7  | 0 | 0.184255  | -4.667537 | 0.010061  |
| 40 | 5  | 0 | 5.230403  | -3.243443 | -0.063690 |
| 41 | 5  | 0 | 3.087983  | -4.567001 | -0.044137 |
| 42 | 5  | 0 | 0.952598  | -5.895330 | -0.029379 |
| 43 | 7  | 0 | 4.520088  | -4.491010 | -0.080907 |
| 44 | 7  | 0 | 2.371341  | -5.816914 | -0.059651 |
| 45 | 1  | 0 | -8.685871 | 2.247872  | -0.085701 |
| 46 | 1  | 0 | -9.648666 | -0.081615 | -0.010512 |
| 47 | 1  | 0 | 8.552279  | -1.814943 | -0.012843 |
| 48 | 1  | 0 | 7.227007  | -4.008414 | -0.109163 |
| 49 | 5  | 0 | -8.023478 | 1.254821  | -0.048930 |
| 50 | 5  | 0 | -7.900587 | -1.254153 | 0.029282  |
| 51 | 7  | 0 | -8.638088 | -0.032222 | -0.008317 |
| 52 | 7  | 0 | 6.516468  | -0.782437 | -0.274537 |
| 53 | 7  | 0 | 6.673120  | -3.160792 | -0.101440 |
| 54 | 5  | 0 | 7.362481  | -1.898006 | -0.109374 |
| 55 | 8  | 0 | 0.428022  | 4.039842  | -0.267262 |
| 56 | 8  | 0 | 3.025350  | 3.076550  | 0.595993  |
| 57 | 1  | 0 | -8.464083 | -2.306608 | 0.057315  |
| 58 | 1  | 0 | -6.220791 | -3.457112 | 0.077747  |
| 59 | 1  | 0 | -4.015399 | -4.604662 | 0.065248  |
| 60 | 1  | 0 | -1.814715 | -5.768506 | 0.026666  |
| 61 | 1  | 0 | 0.403866  | -6.956837 | -0.039074 |
| 62 | 1  | 0 | 1.708494  | 6.038219  | 0.298220  |
| 63 | 6  | 0 | 2.765845  | 5.848021  | 0.189407  |
| 64 | 6  | 0 | 3.836304  | 6.618541  | 0.502490  |
| 65 | 16 | 0 | 3.275254  | 4.313873  | -0.524544 |
| 66 | 6  | 0 | 5.110009  | 5.988719  | 0.204404  |
| 67 | 1  | 0 | 3.752132  | 7.606102  | 0.943864  |
| 68 | 6  | 0 | 4.976152  | 4.752346  | -0.335855 |
| 69 | 1  | 0 | 6.067273  | 6.456025  | 0.409369  |
| 70 | 1  | 0 | 5.738168  | 4.044466  | -0.632264 |

-----

TS2-zig-N

-----

| Center<br>Number | Atomic<br>Number | Atomic<br>Type | Coordinates (Angstroms) |           |          |
|------------------|------------------|----------------|-------------------------|-----------|----------|
|                  |                  |                | X                       | Y         | Z        |
| 1                | 1                | 0              | -5.599497               | 4.474704  | 0.412399 |
| 2                | 1                | 0              | -3.586189               | 6.120805  | 0.383243 |
| 3                | 1                | 0              | 6.774417                | -3.185185 | 0.364412 |
| 4                | 1                | 0              | 4.739995                | -4.755269 | 0.293087 |

|    |   |   |           |           |           |
|----|---|---|-----------|-----------|-----------|
| 5  | 5 | 0 | 1.456611  | -0.311836 | -0.345491 |
| 6  | 5 | 0 | -0.824678 | 0.669722  | -0.459844 |
| 7  | 5 | 0 | 1.130535  | 2.183001  | -0.236595 |
| 8  | 7 | 0 | 2.006007  | 1.029367  | -0.255556 |
| 9  | 7 | 0 | 0.036976  | -0.484370 | -0.545633 |
| 10 | 7 | 0 | -0.298208 | 2.000058  | -0.305261 |
| 11 | 5 | 0 | -0.518836 | -1.831830 | -0.606785 |
| 12 | 5 | 0 | -1.205475 | 3.116993  | -0.134908 |
| 13 | 5 | 0 | 3.431125  | 1.208911  | -0.116377 |
| 14 | 5 | 0 | 1.713222  | -2.818976 | -0.128365 |
| 15 | 5 | 0 | -2.762053 | -0.823345 | -0.539274 |
| 16 | 5 | 0 | -3.164720 | 1.561829  | -0.176240 |
| 17 | 5 | 0 | 0.769606  | 4.655643  | -0.016353 |
| 18 | 5 | 0 | 3.103077  | 3.704484  | -0.049402 |
| 19 | 5 | 0 | 3.744031  | -1.286699 | -0.029895 |
| 20 | 5 | 0 | 5.730657  | 0.244179  | 0.094940  |
| 21 | 5 | 0 | 4.056886  | -3.778539 | 0.230452  |
| 22 | 5 | 0 | 6.053061  | -2.241535 | 0.246808  |
| 23 | 7 | 0 | 2.664061  | -3.800312 | 0.250566  |
| 24 | 7 | 0 | 4.630540  | -2.432192 | 0.146591  |
| 25 | 7 | 0 | 6.608548  | -0.909319 | 0.209560  |
| 26 | 7 | 0 | 0.329475  | -2.945287 | -0.424760 |
| 27 | 7 | 0 | 2.316443  | -1.468013 | -0.202230 |
| 28 | 7 | 0 | 4.302178  | 0.055028  | -0.032570 |
| 29 | 7 | 0 | 6.283578  | 1.590971  | 0.110304  |
| 30 | 7 | 0 | -1.941079 | -1.965339 | -0.751537 |
| 31 | 7 | 0 | 3.981212  | 2.555923  | -0.049624 |
| 32 | 5 | 0 | 5.409757  | 2.736172  | 0.047204  |
| 33 | 5 | 0 | -5.057108 | -0.134176 | -0.028388 |
| 34 | 7 | 0 | -4.131078 | -1.180383 | -0.355876 |
| 35 | 7 | 0 | -2.251041 | 0.489733  | -0.443963 |
| 36 | 7 | 0 | 1.671314  | 3.526213  | -0.113703 |
| 37 | 7 | 0 | -4.575075 | 1.261001  | -0.012243 |
| 38 | 7 | 0 | -2.638394 | 2.898822  | -0.066837 |
| 39 | 7 | 0 | -0.662312 | 4.458823  | -0.003659 |
| 40 | 5 | 0 | -5.494336 | 2.370765  | 0.204512  |
| 41 | 5 | 0 | -3.551187 | 4.001447  | 0.148851  |
| 42 | 5 | 0 | -1.576409 | 5.570874  | 0.175238  |
| 43 | 7 | 0 | -4.957321 | 3.706715  | 0.257992  |
| 44 | 7 | 0 | -2.980737 | 5.321359  | 0.245372  |
| 45 | 1 | 0 | 8.777471  | -1.648900 | 0.400677  |
| 46 | 1 | 0 | 9.546494  | 0.751408  | 0.368167  |
| 47 | 1 | 0 | -8.587825 | 0.495485  | 0.266947  |
| 48 | 1 | 0 | -7.572246 | 2.842402  | 0.424322  |

|    |    |   |           |           |           |
|----|----|---|-----------|-----------|-----------|
| 49 | 5  | 0 | 8.037609  | -0.715573 | 0.309659  |
| 50 | 5  | 0 | 7.714619  | 1.775894  | 0.210627  |
| 51 | 7  | 0 | 8.545887  | 0.618907  | 0.298523  |
| 52 | 7  | 0 | -6.417489 | -0.257090 | 0.379119  |
| 53 | 7  | 0 | -6.907776 | 2.083415  | 0.333403  |
| 54 | 5  | 0 | -7.417234 | 0.738881  | 0.308309  |
| 55 | 8  | 0 | -0.518256 | -4.218760 | 0.193121  |
| 56 | 8  | 0 | -2.766629 | -5.790839 | -0.533021 |
| 57 | 1  | 0 | 8.190834  | 2.871319  | 0.220572  |
| 58 | 1  | 0 | 5.869324  | 3.836793  | 0.079921  |
| 59 | 1  | 0 | 3.562904  | 4.803192  | 0.017101  |
| 60 | 1  | 0 | 1.215182  | 5.759368  | 0.072098  |
| 61 | 1  | 0 | -1.161435 | 6.687389  | 0.271174  |
| 62 | 1  | 0 | -3.237316 | -4.537108 | 2.488552  |
| 63 | 6  | 0 | -3.347738 | -4.061882 | 1.521467  |
| 64 | 6  | 0 | -4.245428 | -3.158935 | 1.133506  |
| 65 | 16 | 0 | -2.225307 | -4.575333 | 0.153641  |
| 66 | 6  | 0 | -4.180485 | -2.651799 | -0.297482 |
| 67 | 1  | 0 | -5.015715 | -2.758787 | 1.790053  |
| 68 | 6  | 0 | -2.790109 | -3.118298 | -0.866045 |
| 69 | 1  | 0 | -5.013731 | -3.057900 | -0.880490 |
| 70 | 1  | 0 | -2.839842 | -3.531755 | -1.879215 |

---
